# Supplementary material for: Approximate Solution for Electroosmotic Flow of Power-Law Fluids in a Planar Microchannel with Asymmetric Electrochemical Boundary Conditions
Source: MDPI journal article supplement (doi:10.3390/mi9060265), 2018-05-28
Supplement: s1 [file s1]

# Supplementary Materials: Approximate Solution for Electroosmotic Flow of Power-Law Fluids in a Planar Microchannel with Asymmetric Electrochemical Boundary Conditions

WooSeok Choi, Sungchan Yun \* and Du-Soon Choi \*

## Maximum Velocity Differences

Table S1 and S2 shows the maximum velocity error  $u_{er}$  defined as  $u_{er} = (u_{ma} - u_{mn})/u_{mn} \times 100$ , where  $u_{ma}$  is the maximum velocity obtained from the approximate solution and  $u_{mn}$  is the maximum velocity obtained from the numerical analysis for various fluid behavior index and Debye length with a fixed zeta potential ratio.

**Table S1.** Flow rate error (%) between approximate solution and numerical analysis at  $Z_R = 1.5$ .

| Fluid Behavior Index ( $n$ ) | $L_D = 0.001$ | $L_D = 0.01$ | $L_D = 0.05$ | $L_D = 0.1$ |
|------------------------------|---------------|--------------|--------------|-------------|
| 1.2                          | -0.13         | -0.55        | -1.50        | -1.86       |
| 1.1                          | -0.09         | -0.34        | -0.89        | -1.09       |
| 1.0                          | -0.04         | -0.01        | 0.00         | -0.01       |
| 0.9                          | 0.07          | 0.53         | 1.27         | 1.55        |
| 0.8                          | 0.28          | 1.43         | 3.17         | 3.81        |

**Table S2.** Flow rate error (%) between approximate solution and numerical analysis at  $Z_R = 0.5$ .

| Fluid Behavior Index ( $n$ ) | $L_D = 0.001$ | $L_D = 0.01$ | $L_D = 0.05$ | $L_D = 0.1$ |
|------------------------------|---------------|--------------|--------------|-------------|
| 1.2                          | -0.15         | -0.77        | -2.07        | -2.71       |
| 1.1                          | -0.10         | -0.46        | -1.21        | -1.57       |
| 1.0                          | -0.01         | -0.01        | -0.01        | 0.00        |
| 0.9                          | 0.13          | 0.70         | 1.71         | 2.19        |
| 0.8                          | 0.42          | 1.86         | 4.24         | 5.33        |
